# Supplementary material for: Determination of Serotonin and Dopamine Metabolites in Human Brain Microdialysis and Cerebrospinal Fluid Samples by UPLC-MS/MS: Discovery of Intact Glucuronide and Sulfate Conjugates
Source: PLoS One. 2013 Jun 27;8(6):e68007. doi: 10.1371/journal.pone.0068007 (PMC3694921; doi:10.1371/journal.pone.0068007)
Supplement: Table S1 — Time segments of the chromatographic runs, SRM transitions and ionisation modes of the analytes. (XLSX) [file pone.0068007.s005.xlsx]

## Sheet: Sheet1
	Table S1. The time segments of the chromatographic run, SRM transitions and ionisation modes of the analytes
	Run 1
	Time(min)	Compound	SRM transitions, CE(V)	Ionization
	0 - 1.2	-	-
	1.2 - 2.5	DA-G	330→137(20),154 (10),91(58)	+
		DA	154→137(6),119(16), 91(25)	+
	2.5 - 4.2	5-HT-G	353→160(30), 336(15), 177(10)	+
	4.2 - 5.4	5-HT	177→160(5),115(30), 132(21)	+
	5.4 - 6.3	5-HT-S	257→240(8),160(21),115(46)	+
	6.3 - 7.6	5-HIAA-G	366→146(25),131(50),113(15)	-
		HVA-G	357→193(6),113(10),175(4),313(9)	-
	7.6 - 8.9	HVA-G	357→193(6),113(10),175(4),313(9)	-
		5-HIAA-S	270→226(8),146(23),80(33)	-
	8.9 - 20	5-HIAA	190→146(3),144(19),116(45)	-
	Run 2
	Time(min)	Compound	SRM transitions, CE(V)	Ionization
	0 - 2.1	-	-
	2.1 - 5	DA-S	232→152(17),122(28)	-
	5 - 8.5	DOPAC-S	247→203(10),123(22)	-
		DOPAC-G	343→299(6),123(25),113(11)	-
		HVA-S	261→217(10),80(35)	-
		DOPAC	167 → 123(3), 95(18)	-
	8.5 - 20	HVA	181→137(1),122(11)	-
